# Supplementary material for: Phenotypic Characterization and Comparative Genomic Analysis of Novel Salmonella Bacteriophages Isolated from a Tropical Rainforest
Source: MDPI journal article supplement (doi:10.3390/ijms24043678), 2023-02-12
Supplement: s1 [file s1]

**Table S1: Summary of isolated phages with their respective isolation host and source of isolation.**

| Phage ID | Isolation host serotype       | Isolation source | GPS coordinate            |
|----------|-------------------------------|------------------|---------------------------|
| PRF-SP1  | <i>Salmonella</i> Paratyphi A | Dry sandy soil   | 5°27'43.2"N 100°11'24.0"E |
| PRF-SP2  | <i>Salmonella</i> Paratyphi A | Wet soil         | 5°26'56.1"N 100°11'42.8"E |
| PRF-SP3  | <i>Salmonella</i> Paratyphi A | Pond Water       | 5°26'49.3"N 100°11'39.5"E |
| PRF-SP4  | <i>Salmonella</i> Paratyphi B | Wet soil         | 5°26'56.1"N 100°11'42.8"E |
| PRF-SP5  | <i>Salmonella</i> Paratyphi B | Pond Water       | 5°26'49.3"N 100°11'39.5"E |
| PRF-SP6  | <i>Salmonella</i> Paratyphi B | Dry sandy soil   | 5°27'43.2"N 100°11'24.0"E |
| PRF-SP7  | <i>Salmonella</i> Paratyphi C | Dry sandy soil   | 5°27'43.2"N 100°11'24.0"E |
| PRF-SP8  | <i>Salmonella</i> Paratyphi C | Wet soil         | 5°26'56.1"N 100°11'42.8"E |
| PRF-SP9  | <i>Salmonella</i> Paratyphi C | Pond Water       | 5°26'49.3"N 100°11'39.5"E |
| PRF-SP10 | <i>Salmonella</i> Typhi       | Dry sandy soil   | 5°27'43.2"N 100°11'24.0"E |
| PRF-SP11 | <i>Salmonella</i> Typhi       | Wet soil         | 5°26'56.1"N 100°11'42.8"E |
| PRF-SP12 | <i>Salmonella</i> Enteritidis | Wet soil         | 5°26'56.1"N 100°11'42.8"E |
| PRF-SP13 | <i>Salmonella</i> Enteritidis | Pond Water       | 5°26'49.3"N 100°11'39.5"E |

**Table S2: Morphological features of phages PRF-SP1, PRF-SP3, PRF-SP4 and PRF-SP5**

| Phage ID | Head Diameter (nm) | Tail Length (nm) |
|----------|--------------------|------------------|
| PRF-SP1  | 58 ± 2.5           | 23 ± 2.2         |
| PRF-SP3  | 50 ± 2.1           | 15 ± 2.2         |
| PRF-SP4  | 75 ± 2.4           | 18 ± 2.1         |
| PRF-SP5  | 76 ± 2.2           | 10 ± 2.5         |

**Table S3: Summary of phage genome details**

| Phage   | Genome size (bp) | Number of Coding<br>Sequence | GC content (%) |
|---------|------------------|------------------------------|----------------|
| PRF-SP1 | 39,732           | 49                           | 50.26          |
| PRF-SP3 | 39,849           | 49                           | 50.28          |
| PRF-SP4 | 39,829           | 49                           | 50.24          |
| PRF-SP5 | 39,849           | 49                           | 50.28          |

**Table S4: Single Nucleotide Polymorphism analysis between the newly isolated phages with each other.** A: PRF-SP1(Ref) vs PRF-SP4(Qry); B: PRF-SP1(Ref) vs PRF-SP3(Qry); C: PRF-SP1(Ref) vs PRF-SP5(Qry); D: PRF-SP3(Ref) vs PRF-SP5(Qry); E: PRF-SP4(Ref) vs PRF-SP5(Qry); F: PRF-SP3(Ref) vs PRF-SP4(Qry). \*\*Ref = Reference genome; Qry= Query

|    |                                            |          |        |                 |                   |                           |
|----|--------------------------------------------|----------|--------|-----------------|-------------------|---------------------------|
| A. | Phage                                      | Position | Change | Effect          | Amino acid change | Predicted function        |
|    | PRF-SP1(REF)<br>vs<br>PRF-SP4<br>(QRY)     | 10893    | C -> T | Non- Synonymous | P 83 L            | Hypothetical protein      |
|    |                                            | 25828    | A -> T | Non- Synonymous | T 706 S           | Tail tubular protein gp12 |
|    |                                            | 35041    | C -> T | Non- Synonymous | A 529 V           | Tail spike protein        |
|    |                                            | 35089    | C -> A | Non- Synonymous | P 545 Q           |                           |
|    |                                            | 35103    | T -> G | Non- Synonymous | S 550 A           |                           |
| B. | PRF-SP1(REF)<br>vs<br>PRF-SP3(QRY)         | 35373    | T -> G | Non- Synonymous | S 640 A           |                           |
|    |                                            |          |        |                 |                   |                           |
|    |                                            |          |        |                 |                   |                           |
|    |                                            |          |        |                 |                   |                           |
|    |                                            |          |        |                 |                   |                           |
|    |                                            |          |        |                 |                   |                           |
| C. | Phage                                      | Position | Change | Effect          | Amino acid change | Predicted function        |
|    | PRF-SP1<br>(REF)<br>vs<br>PRF-SP5<br>(QRY) | 25828    | A -> G | Non- Synonymous | T 706 S           | Tail tubular protein gp12 |
|    |                                            | 35041    | C -> T | Non- Synonymous | A 529 V           | Tail spike protein        |
|    |                                            | 35089    | C -> A | Non- Synonymous | P 545 Q           |                           |
|    |                                            | 35103    | T -> G | Non- Synonymous | S 550 A           |                           |
|    |                                            |          |        |                 |                   |                           |

D.

| Phage                                      | Position | Change | Effect          | Amino acid change | Predicted function        |
|--------------------------------------------|----------|--------|-----------------|-------------------|---------------------------|
| PRF-SP3<br>(REF)<br>vs<br>PRF-SP5<br>(QRY) | 26009    | T -> C | Non- Synonymous | Y 727 C           | Tail tubular protein gp12 |

E.

| Phage                                      | Position | Change | Effect          | Amino acid change | Predicted function      |
|--------------------------------------------|----------|--------|-----------------|-------------------|-------------------------|
| PRF-SP4<br>(REF)<br>vs<br>PRF-SP5<br>(QRY) | 10990    | T -> C | Non- Synonymous | P 83 L            | Hypothetical protein    |
|                                            | 33411    | A -> G | Synonymous      | -                 | Peptidoglycan hydrolase |
|                                            | 3063     | G -> T | Synonymous      | -                 | T7 RNA Polymerase       |
|                                            | 35470    | T -> G | Non- Synonymous | A 640 S           | Tail spike protein      |

F.

| Phage                                      | Position | Change | Effect          | Amino acid change | Predicted function   |
|--------------------------------------------|----------|--------|-----------------|-------------------|----------------------|
| PRF-SP3<br>(REF)<br>vs<br>PRF-SP4<br>(QRY) | 35490    | A -> C | Non- Synonymous | S 640 A           | Tail spike protein   |
|                                            | 11010    | G -> A | Non- Synonymous | P 83 L            | Hypothetical protein |
